# Supplementary material for: Biomarkers of Venous Thromboembolism Recurrence after Discontinuation of Low Molecular Weight Heparin Treatment for Cancer-Associated Thrombosis (HISPALIS-Study)
Source: MDPI journal article supplement (doi:10.3390/cancers14112771), 2022-06-02
Supplement: s1 [file s1]

# Biomarkers of Venous Thromboembolism Recurrence After Discontinuation of Low Molecular Weight Heparin Treatment for Cancer-Associated Thrombosis (HISPALIS-Study)

Remedios Otero, Aurora Solier-López, Verónica Sánchez-López, Julia Oto, Elena Arellano, Samira Marín, Luis Jara-Palomares, Teresa Elías, María Isabel Asencio, Isabel Blasco-Esquivias, María Rodríguez de la Borbolla, José María Sánchez-Díaz, Macarena Real-Domínguez, Emilio García-Cabrera, Francisco Javier Rodríguez-Martorell, and Pilar Medina

**Table S1.** Clinical Characteristics of the patients treated with LMWH beyond 6 months.

|                                                 | Stopped anticoagulant therapy<br>(Included patients)<br>N = 166 | Not stopped anticoagulant therapy<br>(Excluded patients)<br>N = 211 |
|-------------------------------------------------|-----------------------------------------------------------------|---------------------------------------------------------------------|
| Sex male, N (%)                                 | 89 (53.6)                                                       | 121 (57.4)                                                          |
| Age (y), median (IQR)                           | 64 (17)                                                         | 63.6 (16)                                                           |
| Weight (Kg), median (IQR)                       | 71 (20)                                                         | 75.0 (20)                                                           |
| Cancer location, N (%)                          |                                                                 |                                                                     |
| Cerebral                                        | 3 (1.8)                                                         | 5 (2.4)                                                             |
| Digestive                                       | 35 (21.1)                                                       | 59 (28)                                                             |
| Hematologic                                     | 28 (16.9)                                                       | 13 (6)                                                              |
| Breast and Ovarian                              | 30 (18.1)                                                       | 33 (15.5)                                                           |
| Lung                                            | 19 (11.4)                                                       | 40 (19)                                                             |
| Urinary                                         | 26 (15.6)                                                       | 33 (15.5)                                                           |
| Other                                           | 25 (15.1)                                                       | 28 (13)                                                             |
| VTE, N (%)                                      |                                                                 |                                                                     |
| DVT                                             | 89 (53.6)                                                       | 113 (53.4)                                                          |
| PE                                              | 47 (28.3)                                                       | 51 (24)                                                             |
| DTV + PE                                        | 18 (10.8)                                                       | 33 (15.5)                                                           |
| Atypical VTE                                    | 12 (7.2)                                                        | 14 (6.8)                                                            |
| Incidental VTE                                  | 50 (30)                                                         | 89 (42.2)                                                           |
| PT g. 20210G>A, N (%)                           | 6 (5.0)                                                         | 5 (11.0)                                                            |
| FV Leiden, N (%)                                | 10 (6.0)                                                        | 5 (11.0)                                                            |
| Anti-phospholipid antibody, N (%)               | 2 (1.7)                                                         | 1 (2.2)                                                             |
| ECOG status $\geq 2$                            | 16 (9.6)                                                        | 38 (18.1)                                                           |
| Active metastasis, N (%)                        | 65 (39.2)                                                       | 147 (70)                                                            |
| Chemotherapy, N (%)                             | 56 (33.7)                                                       | 125 (59.4)                                                          |
| CV Catheter, N (%)                              | 12 (7.2)                                                        | 29 (13.7)                                                           |
| Months of anticoagulant treatment, median (IQR) | 11 (11)                                                         | 38 (18)                                                             |
| DVT resolution, N (%)                           | 72/107 (67.2)                                                   | 45/145 (31)                                                         |
| PE resolution, N (%)                            | 53/65 (81.5)                                                    | 58/84 (69)                                                          |

Prothrombin gene mutation g.20210G>A, FV Leiden and anti-phospholipid antibody analysis was performed in 120 patients in the stopped anticoagulant therapy group and in 45 patients in the not stopped anticoagulant therapy group. LMWH: low-molecular-weight heparin; IQR: interquartile range; VTE: venous thromboembolism; DVT: deep vein thrombosis; PE: pulmonary embolism; PT: prothrombin; CV: central venous.
